# Supplementary material
Source: Copernicus journal article supplement (doi:10.5194/egusphere-2026-3147)
Supplement: Supplementary file 1 [file egusphere-2026-3147-supplement.pdf]

## S1 Summary of instruments and their availability during the campaign

| Parameter                                                          | Instrument                                                                                | Frequency                                                    | Detection limit                                                                                                                                                                                                                                                    |
|--------------------------------------------------------------------|-------------------------------------------------------------------------------------------|--------------------------------------------------------------|--------------------------------------------------------------------------------------------------------------------------------------------------------------------------------------------------------------------------------------------------------------------|
| <b>SAFIRE ATR-42 research aircraft</b>                             |                                                                                           |                                                              |                                                                                                                                                                                                                                                                    |
| Non-refractory Aerosol Particle Composition                        | mAMS (Aerodyne)                                                                           | Measured at 1 s (FastMS mode), final data averaged over 15 s | Org: $0.08 \mu\text{g m}^{-3}$<br>SO <sub>4</sub> : $0.007 \mu\text{g m}^{-3}$<br>NO <sub>3</sub> : $0.008 \mu\text{g m}^{-3}$<br>Chl: $0.008 \mu\text{g m}^{-3}$<br>NH <sub>4</sub> : $0.034 \mu\text{g m}^{-3}$                                                  |
| Refractory Black Carbon (rBC)                                      | SP2 (DMT)                                                                                 | 1 s                                                          | < $10 \text{ ng m}^{-3}$                                                                                                                                                                                                                                           |
| Aerosol extinction and scattering coefficient at 450 nm and 630 nm | A2S2 (dual CAPS-PM <sub>SSA</sub> , Aerodyne)                                             | Measured at 1 s, final data averaged over 10 s               | 10s integration:<br>$0.69 \text{ Mm}^{-1}$ for $\sigma_{ext,450 \text{ nm}}$<br>$0.45 \text{ Mm}^{-1}$ for $\sigma_{scat,450 \text{ nm}}$<br>$0.21 \text{ Mm}^{-1}$ for $\sigma_{ext,630 \text{ nm}}$<br>$0.12 \text{ Mm}^{-1}$ for $\sigma_{scat,630 \text{ nm}}$ |
| Particle Size Distribution (~100 - 1000 nm)                        | UHSAS (DMT)                                                                               | 1 s                                                          | -                                                                                                                                                                                                                                                                  |
| Particle Size Distribution (~1 – 10 $\mu\text{m}$ )                | Sky-OPC (GRIMM)                                                                           | 6 s                                                          | -                                                                                                                                                                                                                                                                  |
| NO <sub>2</sub>                                                    | TD-LIF for most of the flights and CAPS-NO <sub>2</sub> (T500U, Teledyne) for Flight A036 | 1 s for TD-LIF<br>1 min for CAPS-NO <sub>2</sub>             | 9.8 ppt for TD-LIF<br>< 40 ppt for CAPS-NO <sub>2</sub>                                                                                                                                                                                                            |
| CO                                                                 | Gas analyser (G2401-m, PICARO)                                                            | 1 s                                                          | 15 ppb                                                                                                                                                                                                                                                             |
| O <sub>3</sub>                                                     | Ozone analyser (Model 49i, Thermo Scientific)                                             | 5 s                                                          | 0.5 ppb                                                                                                                                                                                                                                                            |
| <b>PRG ground site</b>                                             |                                                                                           |                                                              |                                                                                                                                                                                                                                                                    |
| Non-refractory Aerosol Particle Composition                        | Time-of-Flight Aerosol Chemical Speciation Monitor (ToF-ACSM, Aerodyne)                   | ~6 min                                                       | Org: $0.31 \mu\text{g m}^{-3}$<br>SO <sub>4</sub> : $0.04 \mu\text{g m}^{-3}$<br>NO <sub>3</sub> : $0.09 \mu\text{g m}^{-3}$<br>Chl: $0.06 \mu\text{g m}^{-3}$                                                                                                     |

|                                                                               |                                                    |          |                                            |
|-------------------------------------------------------------------------------|----------------------------------------------------|----------|--------------------------------------------|
|                                                                               |                                                    |          | NH <sub>4</sub> : 0.19 µg m <sup>-3</sup>  |
| Aerosol absorption coefficient at 370, 470, 520, 590, 660, and 880 and 950 nm | Aethalometer (AE33, Magee Sci.)                    | 1 min    | -                                          |
| Aerosol scattering coefficient at 450, 550, and 700 nm                        | Nephelometer (Ecotech Aurora 4000)                 | 1 min    | < 0.3 Mm <sup>-1</sup> for all wavelengths |
| Particle Size Distribution (~0.02 – ~1 µm)                                    | SMPS (DMA, TSI model 3081 and CPC, TSI model 3775) | ~2.5 min | -                                          |
| NO <sub>2</sub>                                                               | AC32M monitor (Environment SA)                     | 1 s      | 0.4 ppb                                    |
| O <sub>3</sub>                                                                | 41M monitor (Environment SA)                       | 1 s      | 1 ppb                                      |
| CO                                                                            | AIRPARIF network in central Paris                  | 1 h      | -                                          |

**Table S1: Selected airborne plume sampling periods and their corresponding PRG ground-based measurement windows. The estimated average [minimum, maximum] plume travel time is also presented.**

| Instruments                   |        | A027(a) | A027(b) | A028  | A031   | A032   | A033   | A034  | A036                        |
|-------------------------------|--------|---------|---------|-------|--------|--------|--------|-------|-----------------------------|
| <b>SAFIRE aircraft</b>        |        |         |         |       |        |        |        |       |                             |
| mAMS                          |        | Green   | Green   | Green | Green  | Green  | Green  | Green | Green                       |
| SP2                           |        | Red     | Red     | Green | Green  | Green  | Red    | Green | Red                         |
| A2S2                          | 450 nm | Green   | Green   | Red   | Green  | Green  | Green  | Green | Green                       |
|                               | 630 nm | Green   | Red     | Green | Green  | Green  | Green  | Green | Green                       |
| UHSAS                         |        | Green   | Green   | Green | Green  | Green  | Yellow | Green | Green                       |
| Sky-GRIMM                     |        | Green   | Green   | Green | Green  | Green  | Green  | Green | Green                       |
| TD-LIF                        |        | Green   | Green   | Green | Green  | Green  | Green  | Green | Red (CAPS-NO <sub>2</sub> ) |
| O <sub>3</sub> gas analyser   |        | Green   | Green   | Green | Green  | Green  | Green  | Green | Green                       |
| CO gas analyser               |        | Green   | Green   | Green | Green  | Green  | Green  | Green | Green                       |
| <b>PRG site</b>               |        |         |         |       |        |        |        |       |                             |
| ACSM                          |        | Yellow  | Green   | Green | Green  | Green  | Green  | Green | Green                       |
| NEPH                          |        | Red     | Green   | Green | Yellow | Yellow | Green  | Green | Green                       |
| AE33                          |        | Red     | Green   | Green | Yellow | Yellow | Green  | Green | Green                       |
| SMPS                          |        | Green   | Green   | Green | Green  | Green  | Green  | Green | Green                       |
| AC32M NO <sub>2</sub> monitor |        | Green   | Green   | Green | Green  | Green  | Green  | Green | Green                       |
| 41M O <sub>3</sub> monitor    |        | Green   | Green   | Green | Green  | Green  | Green  | Green | Green                       |
| AIRPARIF network CO           |        | Green   | Green   | Green | Green  | Red    | Green  | Green | Green                       |

Table S2: Availability of the instruments used in this study. Green indicates that the instrument was available for the entire period, red indicates that it was unavailable, and yellow indicates partial availability. TD-LIF was replaced by CAPS-NO<sub>2</sub> for Flight A036.

### S3 Selected Paris urban plume period and estimated plume transport time

|                                 | <b>Airborne measured plume periods (ATR 42)</b> | <b>Corresponding ground-based measurement windows (PRG)</b> | <b>Estimated average plume travel time [minimum, maximum]</b> |
|---------------------------------|-------------------------------------------------|-------------------------------------------------------------|---------------------------------------------------------------|
| A027(a)<br>21/06/2022           | 11:15:00 - 11:26:00 UTC                         | 07:00:00 UTC - 10:00:00 UTC                                 | 2.4h [1.6h, 3.7h]                                             |
| A027(b) (plume 1)<br>22/06/2022 | 13:12:00 - 13:21:00 UTC                         | 09:00:00 - 12:00:00 UTC                                     | 2.9h [2.1h, 3.7h]                                             |
| A027(b) (plume 2)<br>22/06/2022 | 13:24:00 - 13:29:30 UTC                         |                                                             | 3.0h [2.4h, 3.4h]                                             |
| A028 (plume 1)<br>23/06/2022    | 11:14:00 - 11:18:00 UTC                         | 06:00:00 - 09:00:00 UTC                                     | 3.1h [2.7h, 3.3h]                                             |
| A028 (plume 2)<br>23/06/2022    | 11:23:00 - 11:28:00 UTC                         |                                                             | 3.6h [3.2h, 3.9h]                                             |
| A031 (plume 1)<br>28/06/2022    | 10:13:00 - 10:17:30 UTC                         | 04:00:00 - 07:00:00 UTC                                     | 4.9h [4.0h, 5.8h]                                             |
| A031 (plume 2)<br>28/06/2022    | 10:23:00 - 10:28:00 UTC                         |                                                             | 5.4h [4.5h, 6.4h]                                             |
| A032 (plume 1)<br>29/06/2022    | 11:13:30 - 11:17:00 UTC                         | 06:00:00 - 09:00:00 UTC                                     | 2.9h [2.5h, 3.3h]                                             |
| A032 (plume 2)<br>29/06/2022    | 11:23:00 - 11:27:00 UTC                         |                                                             | 3.9h [3.2h, 4.4h]                                             |
| A033 (plume 1)<br>01/07/2022    | 11:24:30 - 11:30:00 UTC                         | 06:00:00 - 09:00:00 UTC                                     | 2.9h [2.7h, 3.0h]                                             |
| A033 (plume 2)<br>01/07/2022    | 11:42:00 - 11:46:00 UTC                         |                                                             | 3.5h [3.3h, 3.7h]                                             |
| A034 (plume 1)<br>02/07/2022    | 11:08:00 - 11:14:00 UTC                         | 06:00:00 - 09:00:00 UTC                                     | 4.1h [3.4h, 5.0h]                                             |
| A034 (plume 2)<br>02/07/2022    | 11:30:00 - 11:34:00 UTC                         |                                                             | 5.9h [5.5h, 6.5h]                                             |
| A036 (plume 1)<br>05/07/2022    | 13:31:00 - 13:36:00 UTC                         | 08:00:00 - 11:00:00 UTC                                     | 4.2h [4.0h, 4.3h]                                             |
| A036 (plume 2)<br>05/07/2022    | 13:41:00 - 13:48:00 UTC                         |                                                             | 3.4h [3.0h, 3.7h]                                             |

15 **Table S3: Selected airborne plume sampling periods and their corresponding PRG ground-based measurement windows. The estimated average [minimum, maximum] plume travel time is also presented.**

#### S4 Comparison of aerosol volume derived from UHSAS measurements with that estimated by mAMS

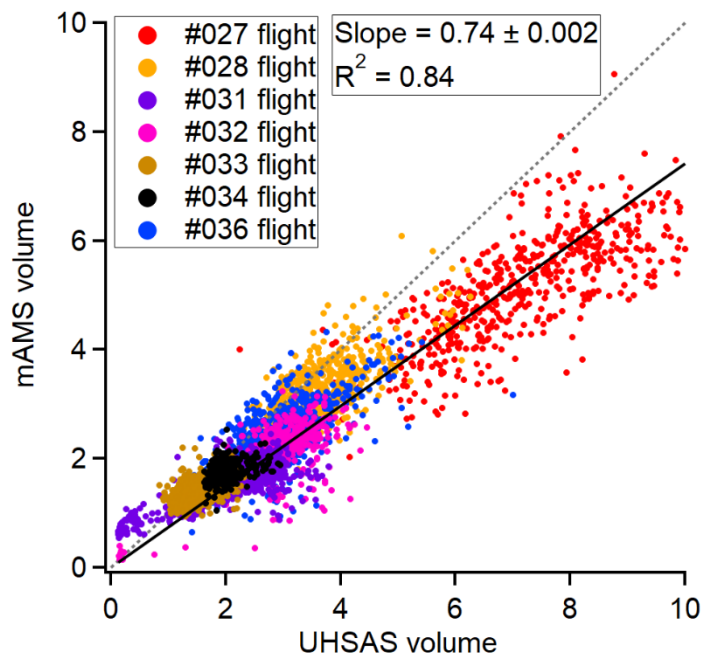

20 Figure S1: Comparison between the mAMS estimated aerosol volume and the UHSAS derived volume. The total mass concentrations measured from the mAMS were converted to total volume concentrations, using densities of  $1.27 \text{ g cm}^{-3}$  for organics,  $1.77 \text{ g cm}^{-3}$  for inorganics.

**S5 Average airborne measured PM<sub>1</sub> components mass concentrations for each flight**

|                                    | <b>Org (<math>\mu\text{g m}^{-3}</math>)</b> | <b>SO<sub>4</sub> (<math>\mu\text{g m}^{-3}</math>)</b> | <b>NO<sub>3</sub> (<math>\mu\text{g m}^{-3}</math>)</b> | <b>Chl (<math>\mu\text{g m}^{-3}</math>)</b> | <b>NH<sub>4</sub> (<math>\mu\text{g m}^{-3}</math>)</b> | <b>rBC (<math>\mu\text{g m}^{-3}</math>)</b> |
|------------------------------------|----------------------------------------------|---------------------------------------------------------|---------------------------------------------------------|----------------------------------------------|---------------------------------------------------------|----------------------------------------------|
| A027(a) (Plume)<br>22/06/2022      | 6.05 ± 0.43                                  | 1.86 ± 0.15                                             | 0.82 ± 0.17                                             | 0.13 ± 0.04                                  | 0.83 ± 0.08                                             | N/A                                          |
| A027(a) (Background)<br>22/06/2022 | 5.94 ± 0.74                                  | 1.85 ± 0.15                                             | 0.69 ± 0.15                                             | 0.15 ± 0.04                                  | 0.79 ± 0.07                                             | N/A                                          |
| A027(b) (Plume)<br>22/06/2022      | 6.53 ± 0.78                                  | 1.65 ± 0.20                                             | 0.95 ± 0.31                                             | 0.15 ± 0.03                                  | 0.79 ± 0.13                                             | N/A                                          |
| A027(b) (Background)<br>22/06/2022 | 6.37 ± 0.73                                  | 1.79 ± 0.16                                             | 0.65 ± 0.20                                             | 0.15 ± 0.03                                  | 0.76 ± 0.10                                             | N/A                                          |
| A028 (Plume)<br>23/06/2022         | 3.23 ± 0.39                                  | 0.76 ± 0.10                                             | 0.27 ± 0.10                                             | 0.09 ± 0.08                                  | 0.44 ± 0.06                                             | 0.18 ± 0.07                                  |
| A028 (Background)<br>23/06/2022    | 2.80 ± 0.42                                  | 0.84 ± 0.14                                             | 0.26 ± 0.08                                             | 0.08 ± 0.08                                  | 0.46 ± 0.07                                             | 0.10 ± 0.05                                  |
| A031 (Plume)<br>28/06/2022         | 1.47 ± 0.20                                  | 0.42 ± 0.05                                             | 0.22 ± 0.08                                             | 0.08 ± 0.02                                  | 0.23 ± 0.02                                             | N/A                                          |
| A031 (Background)<br>28/06/2022    | 1.34 ± 0.19                                  | 0.41 ± 0.03                                             | 0.18 ± 0.05                                             | 0.07 ± 0.02                                  | 0.21 ± 0.02                                             | N/A                                          |
| A032 (Plume)<br>29/06/2022         | 2.14 ± 0.24                                  | 0.43 ± 0.04                                             | 0.24 ± 0.07                                             | 0.09 ± 0.03                                  | 0.23 ± 0.02                                             | 0.18 ± 0.24                                  |
| A032 (Background)<br>29/06/2022    | 1.86 ± 0.39                                  | 0.40 ± 0.04                                             | 0.15 ± 0.06                                             | 0.09 ± 0.03                                  | 0.20 ± 0.02                                             | 0.09 ± 0.16                                  |
| A033 (Plume)<br>01/07/2022         | 1.23 ± 0.22                                  | 0.32 ± 0.04                                             | 0.25 ± 0.08                                             | 0.07 ± 0.02                                  | 0.19 ± 0.03                                             | 0.12 ± 0.05                                  |
| A033 (Background)<br>01/07/2022    | 1.21 ± 0.18                                  | 0.28 ± 0.04                                             | 0.18 ± 0.05                                             | 0.07 ± 0.02                                  | 0.16 ± 0.02                                             | 0.04 ± 0.04                                  |
| A034 (Plume)<br>02/07/2022         | 1.72 ± 0.18                                  | 0.35 ± 0.04                                             | 0.20 ± 0.05                                             | 0.08 ± 0.02                                  | 0.19 ± 0.02                                             | N/A                                          |
| A034 (Background)<br>02/07/2022    | 1.54 ± 0.17                                  | 0.33 ± 0.04                                             | 0.19 ± 0.06                                             | 0.08 ± 0.02                                  | 0.18 ± 0.02                                             | N/A                                          |
| A036 (Plume)<br>05/07/2022         | 3.15 ± 0.50                                  | 0.58 ± 0.06                                             | 0.30 ± 0.12                                             | 0.15 ± 0.04                                  | 0.31 ± 0.04                                             | N/A                                          |
| A036 (Background)<br>05/07/2022    | 1.91 ± 0.38                                  | 0.59 ± 0.10                                             | 0.15 ± 0.09                                             | 0.13 ± 0.04                                  | 0.26 ± 0.05                                             | N/A                                          |

25 **Table S4: Average airborne measured PM<sub>1</sub> components mass concentrations (reported as mean ± standard deviation) for each flight**

## S6 Average airborne measured optical parameters for each flight

|                                    | 450 nm                       |                               |             | 630 nm                       |                               |             |
|------------------------------------|------------------------------|-------------------------------|-------------|------------------------------|-------------------------------|-------------|
|                                    | $\sigma_{ext}$ ( $Mm^{-1}$ ) | $\sigma_{scat}$ ( $Mm^{-1}$ ) | SSA         | $\sigma_{ext}$ ( $Mm^{-1}$ ) | $\sigma_{scat}$ ( $Mm^{-1}$ ) | SSA         |
| A027(a) (Plume)<br>22/06/2022      | 67.02 ± 8.08                 | 58.09 ± 6.90                  | 0.87 ± 0.04 | 39.40 ± 5.21                 | 33.49 ± 4.42                  | 0.85 ± 0.04 |
| A027(a) (Background)<br>22/06/2022 | 55.27 ± 6.36                 | 49.64 ± 4.56                  | 0.90 ± 0.07 | 32.23 ± 4.42                 | 27.77 ± 3.51                  | 0.86 ± 0.03 |
| A027(b) (Plume)<br>22/06/2022      | 81.62 ± 13.73                | 68.51 ± 12.08                 | 0.84 ± 0.06 | N/A                          | N/A                           | N/A         |
| A027(b) (Background)<br>22/06/2022 | 58.33 ± 5.63                 | 53.67 ± 7.55                  | 0.92 ± 0.06 | N/A                          | N/A                           | N/A         |
| A028 (Plume)<br>23/06/2022         | N/A                          | N/A                           | N/A         | 21.35 ± 3.22                 | 17.49 ± 2.33                  | 0.83 ± 0.10 |
| A028 (Background)<br>23/06/2022    | N/A                          | N/A                           | N/A         | 15.82 ± 2.03                 | 13.44 ± 1.73                  | 0.85 ± 0.05 |
| A031 (Plume)<br>28/06/2022         | 13.14 ± 2.23                 | 11.70 ± 1.72                  | 0.90 ± 0.08 | 9.23 ± 2.20                  | 7.79 ± 1.56                   | 0.86 ± 0.08 |
| A031 (Background)<br>28/06/2022    | 8.90 ± 1.20                  | 8.31 ± 0.83                   | 0.94 ± 0.05 | 6.05 ± 1.55                  | 5.54 ± 1.60                   | 0.91 ± 0.10 |
| A032 (Plume)<br>29/06/2022         | 22.03 ± 3.69                 | 17.77 ± 2.03                  | 0.82 ± 0.10 | 14.42 ± 2.27                 | 12.24 ± 2.10                  | 0.85 ± 0.06 |
| A032 (Background)<br>29/06/2022    | 15.43 ± 3.30                 | 12.95 ± 2.67                  | 0.85 ± 0.09 | 9.29 ± 2.74                  | 8.43 ± 2.42                   | 0.91 ± 0.08 |
| A033 (Plume)<br>01/07/2022         | 8.04 ± 1.84                  | 7.06 ± 1.42                   | 0.89 ± 0.10 | 6.26 ± 2.55                  | 5.61 ± 2.15                   | 0.91 ± 0.10 |
| A033 (Background)<br>01/07/2022    | 5.57 ± 1.06                  | 5.13 ± 0.96                   | 0.93 ± 0.10 | 4.87 ± 2.49                  | 4.47 ± 2.29                   | 0.93 ± 0.10 |
| A034 (Plume)<br>02/07/2022         | 11.09 ± 1.09                 | 9.62 ± 1.16                   | 0.87 ± 0.10 | 6.44 ± 1.80                  | 5.41 ± 1.60                   | 0.85 ± 0.14 |
| A034 (Background)<br>02/07/2022    | 7.04 ± 1.95                  | 6.44 ± 1.36                   | 0.93 ± 0.10 | 4.78 ± 2.27                  | 4.38 ± 2.14                   | 0.93 ± 0.11 |
| A036 (Plume)<br>05/07/2022         | 25.69 ± 4.47                 | 21.40 ± 3.19                  | 0.84 ± 0.08 | 15.94 ± 3.08                 | 13.37 ± 2.39                  | 0.84 ± 0.05 |
| A036 (Background)<br>05/07/2022    | 15.85 ± 2.37                 | 13.49 ± 1.74                  | 0.86 ± 0.07 | 8.79 ± 1.66                  | 7.49 ± 1.19                   | 0.86 ± 0.08 |

30

**Table S5: Average airborne measured optical parameters (reported as mean ± standard deviation) for each flight**

**S7 Average airborne measured metrological parameters for each flight**

|                    | <b>Ambient T (°C)</b> | <b>Ambient RH (%)</b> | <b>RH measured at inlet (%)</b> | <b>Horizontal wind direction (degree)</b> | <b>Horizontal wind speed (m s<sup>-1</sup>)</b> |
|--------------------|-----------------------|-----------------------|---------------------------------|-------------------------------------------|-------------------------------------------------|
| A027(a) 22/06/2022 | 19.1 ± 0.5            | 68 ± 7                | 37 ± 2                          | 68.97 ± 17.51                             | 3.96 ± 0.93                                     |
| A027(b) 22/06/2022 | 18.1 ± 0.5            | 74 ± 7                | 27 ± 2                          | 81.39 ± 13.82                             | 5.39 ± 0.97                                     |
| A028 23/06/2022    | 19.6 ± 0.5            | 67 ± 3                | 30 ± 1                          | 193.25 ± 12.67                            | 5.56 ± 1.00                                     |
| A031 28/06/2022    | 16.1 ± 0.2            | 56 ± 2                | 22 ± 1                          | 188.95 ± 15.39                            | 5.68 ± 1.27                                     |
| A032 29/06/2022    | 18.5 ± 0.7            | 47 ± 2                | 20 ± 1                          | 209.05 ± 15.84                            | 5.86 ± 1.33                                     |
| A033 01/07/2022    | 14.0 ± 0.3            | 57 ± 2                | 22 ± 1                          | 253.68 ± 15.66                            | 4.96 ± 1.07                                     |
| A034 02/07/2022    | 17.5 ± 0.6            | 46 ± 2                | 21 ± 1                          | 192.44 ± 23.18                            | 4.01 ± 1.61                                     |
| A036 05/07/2022    | 19.8 ± 0.3            | 45 ± 3                | 17 ± 1                          | 309.55 ± 67.37                            | 4.06 ± 1.10                                     |

35

**Table S6: Average airborne measured metrological parameters (reported as mean ± standard deviation) for each flight**

## S8 Average PM<sub>1</sub> component mass fraction at PRG and downwind urban plume

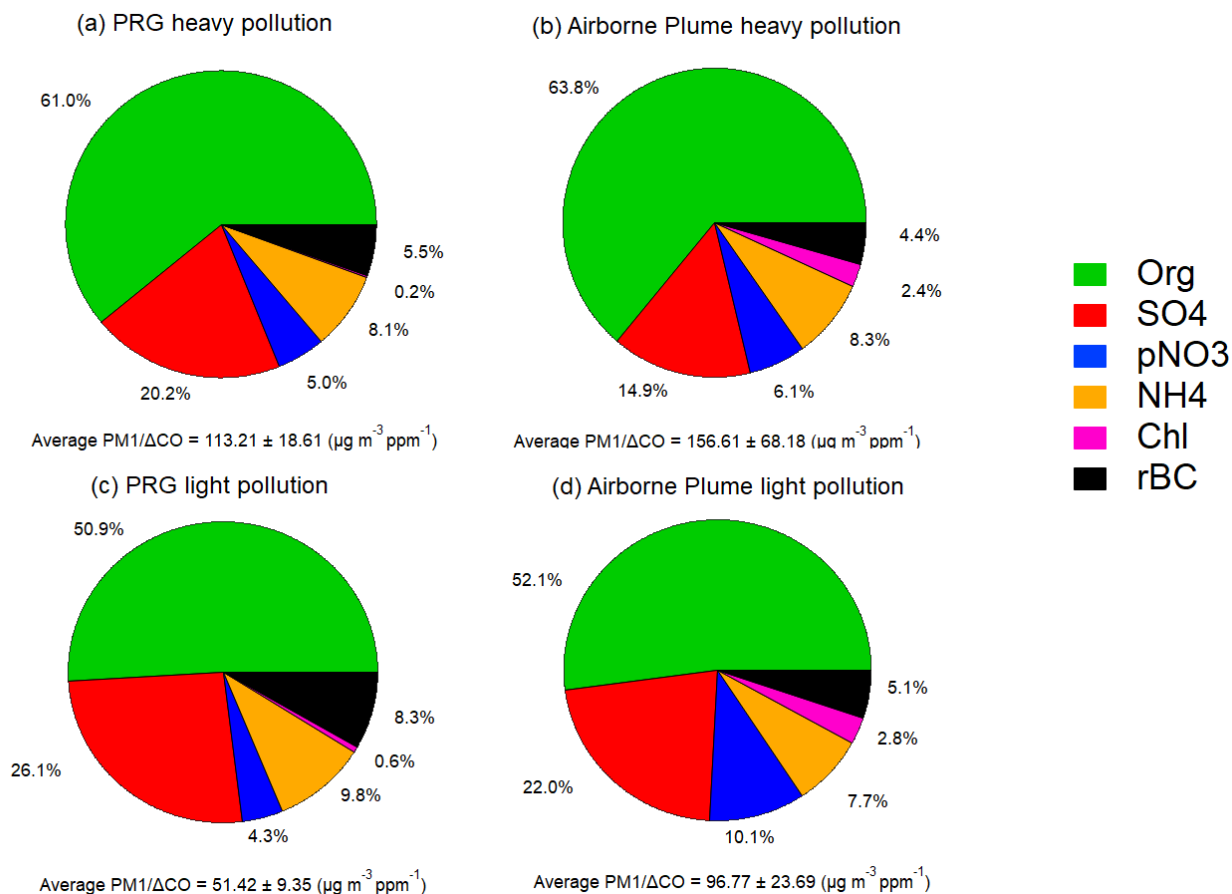

**Figure S2: Mass fraction of PM<sub>1</sub> components measured at (a)(c) PRG urban site and (b)(d) downwind urban plume derived from airborne results at heavy and light pollution periods. The uncertainty in the average PM<sub>1</sub>/ΔCO represents the standard deviation.**

40 Unlike Figure 7 in the main text, which includes all flights and the corresponding PRG emission periods, the analysis here is restricted to flights with available SP2 measurements (A033 for the light pollution period, and A028 and A032 for the heavy pollution period), along with their corresponding PRG emission periods.

## 45 S9 Estimation the real part of Org CRI

The real part of the Org CRI ( $n_{\text{Org}}$ ) was retrieved using a volume-weighted linear mixing rule. Mass concentrations of NR-PM<sub>1</sub> species measured by ACSM/mAMS were converted to volume concentrations using densities of 1.27 g cm<sup>-3</sup> for Org, 1.77 g cm<sup>-3</sup> for inorganics (Inorg), from which the volume fractions of Org ( $VF_{\text{Org}}$ ) and Inorg ( $VF_{\text{Inorg}}$ ) in NR-PM<sub>1</sub> were calculated. Assuming linear mixing of CRI, the real part of the Org CRI ( $n_{\text{Org}}$ ) was obtained as:

$$50 \quad n_{\text{Org}} = \frac{n_{\text{total}} - n_{\text{Inorg}}VF_{\text{Inorg}}}{VF_{\text{Org}}}$$

where  $n_{\text{total}}$  is the measured real part of the CRI derived using the method described in Section 2.4 in the manuscript.  $n_{\text{Inorg}}$  represents the real part of the CRI of Inorg and is assumed to be 1.53, representative of non-absorbing Inorg. BC was not included in this analysis because the airborne SP2 measurements were partly unavailable. Nevertheless, BC contributed only a limited fraction of the total PM<sub>1</sub> mass, with PRG rBC < 10% and airborne rBC < 5%. Therefore, excluding BC is unlikely to affect the observed trend in the variation of  $n_{\text{Org}}$ . The absolute values of  $n_{\text{Org}}$  may still be subject to some uncertainty due to other assumptions regarding component densities and aerosol mixing state; here,  $n_{\text{Org}}$  is primarily used to illustrate the relative variation in the optical properties of Org rather than to provide precise absolute values.

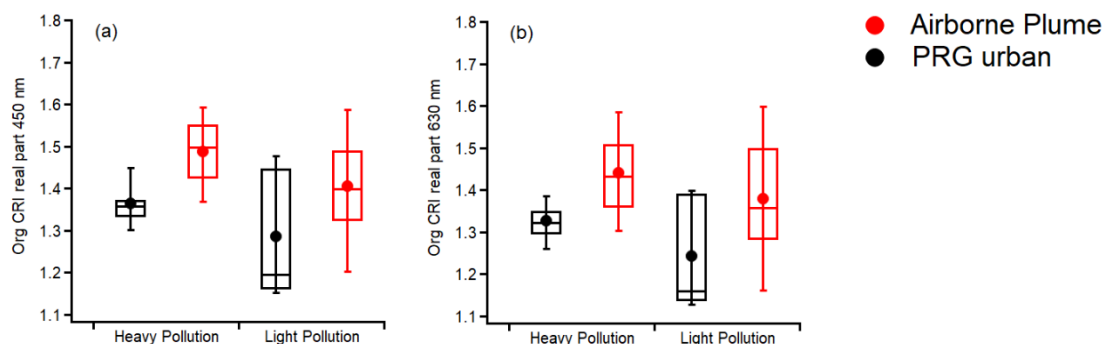

60 **Figure S3: Estimated Org CRI real part values at (a) 450 nm, (b) 630 nm at the PRG urban site and in the downwind urban plume from airborne observations during light and heavy pollution periods.**
